# Supplementary material for: Effectiveness of slightly acidic electrolyzed water on bacteria reduction: in vitro and spray evaluation
Source: PeerJ. 2020 Feb 18;8:e8593. doi: 10.7717/peerj.8593 (PMC7034383; doi:10.7717/peerj.8593)
Supplement: Supplemental Information 2 — Comparison of the bactericidal effect of SAEW and sodium hypochlorite against Escherichia coli and Pseudomonas aeruginosa. [file peerj-08-8593-s002.xlsx]

## Sheet: In vitro
In Vitro Experiment Results, SAEW 0.5 ppm
Escherichia coli
Control								SAEW 0.5 mg/L							NaOCl 0.5 mg/L
	n1	n2	n3	n4	n5	n6			n1	n2	n3	n4	n5			n1	n2	n3	n4	n5	n6
Dilution Factor	100	100	100	100	100	100		Dilution Factor	1	1	1	1	1		Dilution Factor	10	100	100	1	10	1
Plate 1	258	256	263	269	249	260		Plate 1	0	0	0	0	0		Plate 1	120	90	153	121	140	191
Plate 2	286	237	259	230	245	270		Plate 2	0	0	0	0	0		Plate 2	96	97	185	85	173	159
Control								SAEW 0.5 mg/L							NaOCl 0.5 mg/L
	n1	n2	n3	n4	n5	n6			n1	n2	n3	n4	n5			n1	n2	n3	n4	n5	n6
Dilution Factor	100	100	100	100	100	100		Dilution Factor	1	1	1	1	1		Dilution Factor	10	100	100	1	10	1
Plate 1	258	256	263	269	249	260		Plate 1	1	1	1	1	1		Plate 1	120	90	153	121	140	191
Plate 2	286	237	259	230	245	270		Plate 2	1	1	1	1	1		Plate 2	96	97	185	85	173	159
Average	272	246.5	261	249.5	247	265		Average	1	1	1	1	1		Average	108	93.5	169	103	156.5	175
Tube Count	2720	2465	2610	2495	2470	2650		Tube Count	10	10	10	10	10		Tube Count	1080	935	1690	1030	1565	1750
Real Count	272000	246500	261000	249500	247000	265000		Real Count	10	10	10	10	10		Real Count	10800	93500	169000	1030	15650	1750
Log Real Count	8.43457	8.39182	8.41664	8.39707	8.3927	8.42325
Average	8.40934
Std. Dev.	0.0179875
Control								SAEW 0.5 mg/L							NaOCl 0.5 mg/L
	n1	n2	n3	n1	n2	n3			n1	n2	n3	n4	n5			n1	n2	n3	n4	n5	n6
Initial Count	310000000	310000000	310000000	234000000	234000000	234000000		Initial Count	310000000	310000000	306000000	306000000	306000000		Initial Count	234000000	234000000	234000000	257000000	257000000	257000000
Experimental Count	310000	310000	310000	234000	234000	234000		Experimental Count	310000	310000	306000	306000	306000		Experimental Count	234000	234000	234000	257000	257000	257000
Previous Real Count	272000	246500	261000	249500	247000	265000		Previous Real Count	10	10	10	10	10		Previous Real Count	10800	93500	169000	1030	15650	1750
Log Difference	0.0567928	0.0995448	0.0747212	0.0278547	0.0234811	0.05403		Log Difference	4.49136	4.49136	4.48572	4.48572	4.48572		Log Difference	1.33579	0.398404	0.141329	2.3971	1.21542	2.1669
Average	0.0560708							Average	4.48798						Average	1.27582
Std. Dev.	0.0286382							Std. Dev.	0.0030893						Std. Dev.	0.907243
Count Unit: CFU/mL
When no colonies were observed, it was assumed that 0 colonies were formed in the stock solution
Since 0 colonies do not allow logarithmic calculations, calculations were performed assuming that the number was less than 1
In Vitro Experiment Results, SAEW 0.5 ppm
Pseudomonas aeruginosa
Control								SAEW 0.5 mg/L							NaOCl 0.5 mg/L
	n1	n2	n3	n1	n2	n3			n1	n2	n3	n4	n5			n1	n2	n3	n4	n5	n6
Dilution Factor	100	100	100	1000	1000	1000		Dilution Factor	1	1	1	1	1		Dilution Factor	1	1	1	100	100	100
Plate 1	239	304	260	36	38	35		Plate 1	0	0	0	0	0		Plate 1	0	1	0	43	88	55
Plate 2	210	267	277	23	32	39		Plate 2	1	0	0	0	0		Plate 2	0	0	0	34	71	57
Control								SAEW 0.5 mg/L							NaOCl 0.5 mg/L
	n1	n2	n3	n1	n2	n3			n1	n2	n3	n4	n5			n1	n2	n3	n4	n5	n6
Dilution Factor	100	100	100	1000	1000	1000		Dilution Factor	1	1	1	1	1		Dilution Factor	10	100	100	1	10	1
Plate 1	239	304	260	36	38	35		Plate 1	1	1	1	1	1		Plate 1	1	1	1	43	88	55
Plate 2	210	267	277	23	32	39		Plate 2	1	1	1	1	1		Plate 2	1	1	1	34	71	57
Average	224.5	285.5	268.5	29.5	35	37		Average	1	1	1	1	1		Average	1	1	1	38.5	79.5	56
Tube Count	2245	2855	2685	295	350	370		Tube Count	10	10	10	10	10		Tube Count	10	10	10	385	795	560
Real Count	224500	285500	268500	295000	350000	370000		Real Count	10	10	10	10	10		Real Count	100	1000	1000	385	7950	560
Log Real Count	8.35122	8.45561	8.42894	8.46982	8.54407	8.5682
Average	8.46964
Std. Dev.	0.0789066
Control								SAEW 0.5 mg/L							NaOCl 0.5 mg/L
	n1	n2	n3	n1	n2	n3			n1	n2	n3	n4	n5			n1	n2	n3	n4	n5	n6
Initial Count	241000000	241000000	241000000	193000000	193000000	193000000		Initial Count	241000000	241000000	236000000	236000000	236000000		Initial Count	193000000	193000000	193000000	120000000	120000000	120000000
Experimental Count	241000	241000	241000	193000	193000	193000		Experimental Count	241000	241000	236000	236000	236000		Experimental Count	193000	193000	193000	120000	120000	120000
Previous Real Count	224500	285500	268500	295000	350000	370000		Previous Real Count	10	10	10	10	10		Previous Real Count	100	1000	1000	385	7950	560
Log Difference	0.0308007	0.0735891	0.0469272	0.184265	0.258511	0.282644		Log Difference	4.38202	4.38202	4.37291	4.37291	4.37291		Log Difference	3.28556	2.28556	2.28556	2.49372	1.17881	2.33099
Average	0.146123							Average	4.37655						Average	2.31003
Std. Dev.	0.110566							Std. Dev.	0.00498704						Std. Dev.	0.673303
Count Unit: CFU/mL
When no colonies were observed, it was assumed that 0 colonies were formed in the stock solution
Since 0 colonies do not allow logarithmic calculations, calculations were performed assuming that the number was less than 1
